# Supplementary material for: The Thermal Stability of Janus Monolayers SnXY (X, Y = O, S, Se): Ab-Initio Molecular Dynamics and Beyond
Source: MDPI journal article supplement (doi:10.3390/nano12010101), 2021-12-29
Supplement: s1 [file s1]

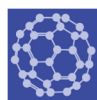

Supplementary Material

# The Thermal Stability of Janus Monolayers SnXY (X, Y = O, S, Se): Ab-Initio Molecular Dynamics and Beyond

Yufeng Luo, Shihao Han, Rui Hu, Hongmei Yuan, Wenyan Jiao and Huijun Liu \*

Key Laboratory of Artificial Micro- and Nano-Structures of Ministry of Education and School of Physics and Technology, Wuhan University, Wuhan 430072, China;

luoyuf\_0902@whu.edu.cn (Y.L.); hansh123@whu.edu.cn (S.H.); ruihu16@whu.edu.cn (R.H.);

hmyuan@whu.edu.cn (H.Y.); jiaowu@whu.edu.cn (W.J.)

\* Correspondence: phlhj@whu.edu.cn

## 1. The phonon dispersion relations of Janus monolayers SnXY (X, Y = O, S, Se)

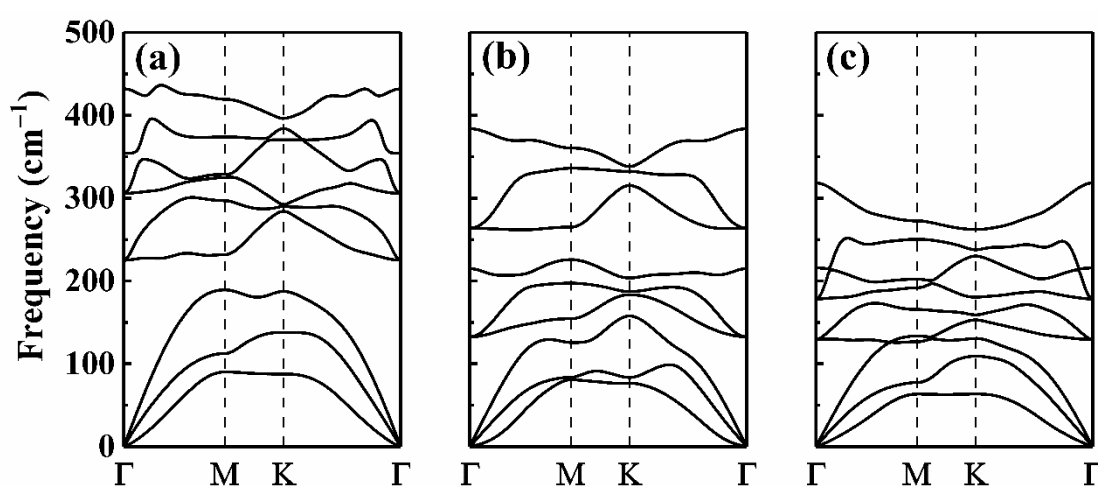

Figure S1. The phonon dispersion relations of Janus monolayers (a) SnOS, (b) SnOSe and (c) SnSSe.

## 2. The *ab-initio* molecular dynamics (AIMD) simulations for the Janus monolayers SnXY (X, Y = O, S, Se)

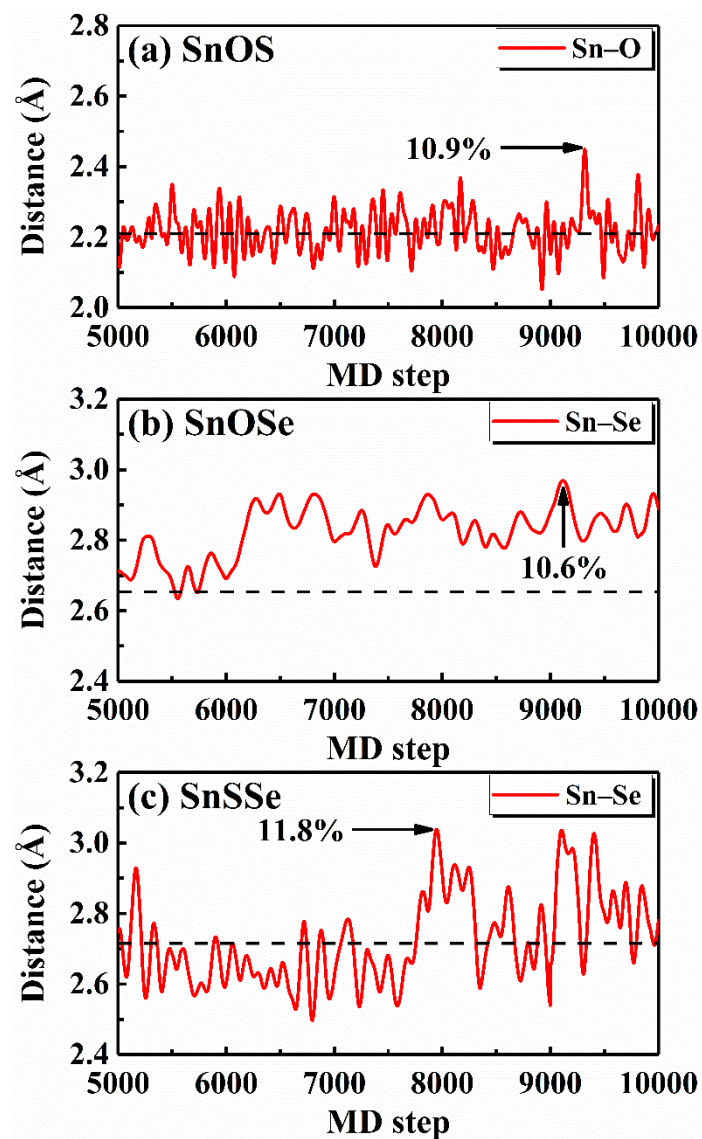

**Figure S2.** The AIMD results of the bond distances for the Janus monolayers (a) SnOS at 525 K, (b) SnOSe at 100 K, and (c) SnSSe at 825 K. For each case, only that with larger fluctuation around the equilibrium length is shown.

### 3. The AIMD simulations for the TMD monolayers $\text{SnX}_2$ ( $\text{X} = \text{O}, \text{S}, \text{Se}$ )

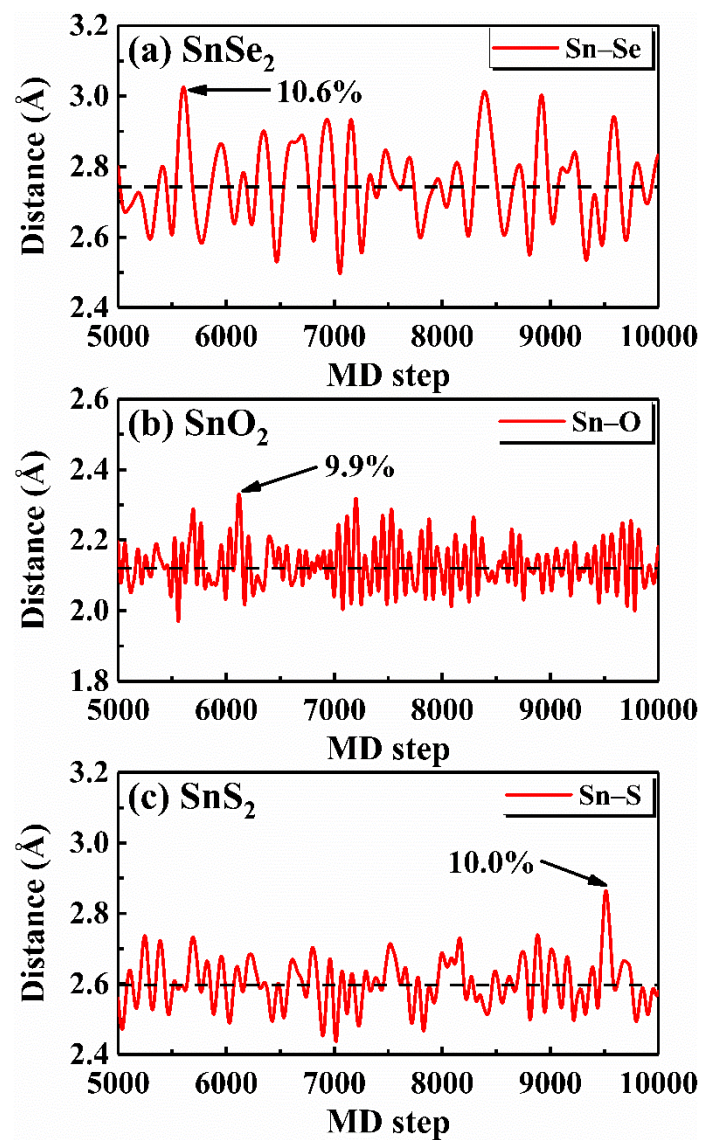

**Figure S3.** The AIMD results of the bond distances for the monolayers (a)  $\text{SnSe}_2$  at 437 K, (b)  $\text{SnO}_2$  at 500 K, and (c)  $\text{SnS}_2$  at 675 K, where the maximum fluctuations around the equilibrium lengths are shown.
